# Supplementary material for: LncNetP, a systematical lncRNA prioritization approach based on ceRNA and disease phenotype association assumptions
Source: PubMed Central journal article supplement (PMC5777717; doi:10.18632/oncotarget.23059), 2017-12-08
Supplement: oncotarget-08-114603-s001.pdf [file oncotarget-08-114603-s001.pdf]

## LncNetP, a systematical lncRNA prioritization approach based on ceRNA and disease phenotype association assumptions

### SUPPLEMENTARY MATERIALS

**Supplementary Table 1: Summary of lncRNA and miRNA datasets in TCGA**

| OMIM ID | Cancer types | Full names                                                       | Common samples |
|---------|--------------|------------------------------------------------------------------|----------------|
| 109800  | BLCA         | Bladder urothelial carcinoma                                     | 232            |
| 114480  | BRCA         | Breast invasive carcinoma                                        | 403            |
| 603956  | CESC         | Cervical squamous cell carcinoma and endocervical adenocarcinoma | 193            |
| 144700  | KIRC         | Kidney renal clear cell carcinoma                                | 121            |
| 137800  | LGG          | Brain lower grade glioma                                         | 482            |
| 114550  | LIHC         | Liver hepatocellular carcinoma                                   | 147            |
| 211980  | LUAD         | Lung adenocarcinoma                                              | 369            |
| 176807  | PRAD         | Prostate adenocarcinoma                                          | 318            |
| 613659  | STAD         | Stomach adenocarcinoma                                           | 210            |
| 188550  | THCA         | Thyroid carcinoma                                                | 433            |
| 608089  | UCEC         | Uterine corpus endometrioid carcinoma                            | 181            |

**Supplementary Table 2: The statistics of the ratios of lncRNA-miRNA pairs that having the same biological functions**

| Cancer types | lncRNA-miRNA pairs in the top 10% of lncRNA lists | No.of miRNA-lncRNA pairs with the same GO functions | Ratios |
|--------------|---------------------------------------------------|-----------------------------------------------------|--------|
| BRCA         | 63118 (1273 lncRNAs and 718 miRNAs)               | 26368                                               | 41.76% |
| LIHC         | 62319 (1273 lncRNAs and 679 miRNAs)               | 24371                                               | 39.11% |
| PRAD         | 63167 (1273 lncRNAs and 690 miRNAs)               | 28656                                               | 45.37% |

**Supplementary Table 3: Summary of disease-specific lncRNA networks of eleven cancer types**

| Cancer types | Nodes | Edges    |
|--------------|-------|----------|
| BLCA         | 12680 | 3352608  |
| BRCA         | 12683 | 31319979 |
| CESC         | 12507 | 30419975 |
| KIRC         | 12693 | 38724674 |
| LGG          | 12701 | 32181151 |
| LIHC         | 12475 | 38971212 |
| LUAD         | 12615 | 30843054 |
| PRAD         | 12674 | 34536674 |
| STAD         | 12716 | 39856779 |
| THCA         | 12655 | 37701765 |
| UCES         | 2650  | 1026721  |

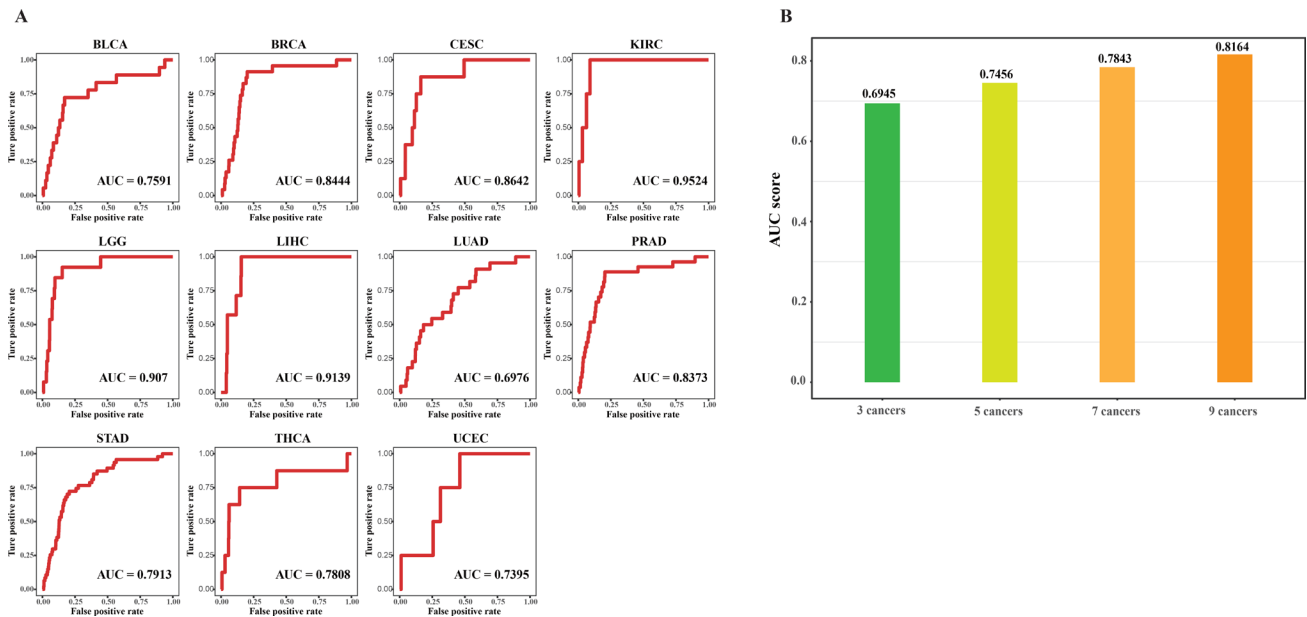

**Supplementary Figure 1: Results of prediction and randomly selected cancer types. (A)** The lncRNA prediction results calculated only using other disease information. **(B)** The prioritization results through random selection of 3, 5, 7, and 9 cancer types.

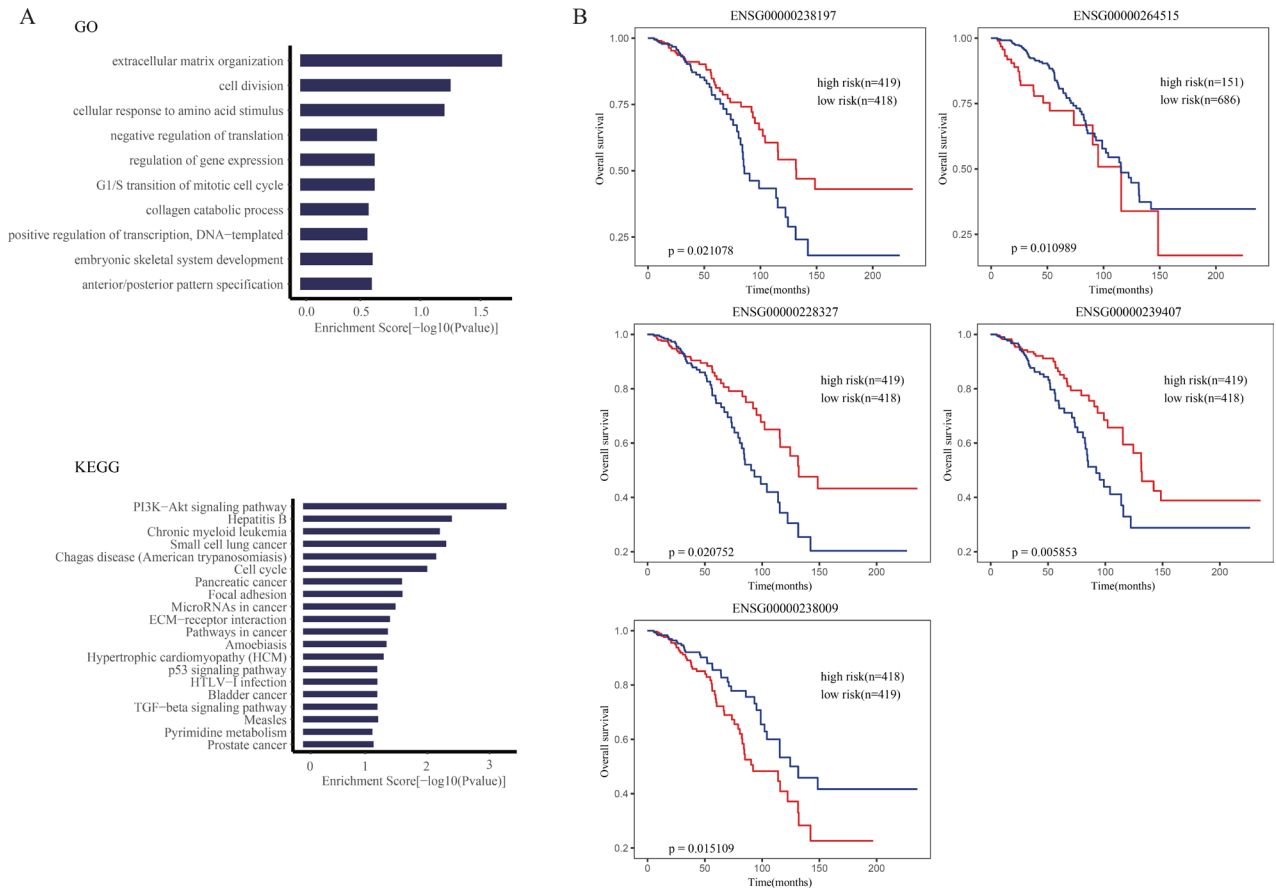

**Supplementary Figure 2: The prioritization results in the case study of BRCA. (A)** The GO and KEGG enrichment analysis results for top 10% lncRNAs of BRCA. **(B)** Survival analysis results of five candidate lncRNAs.

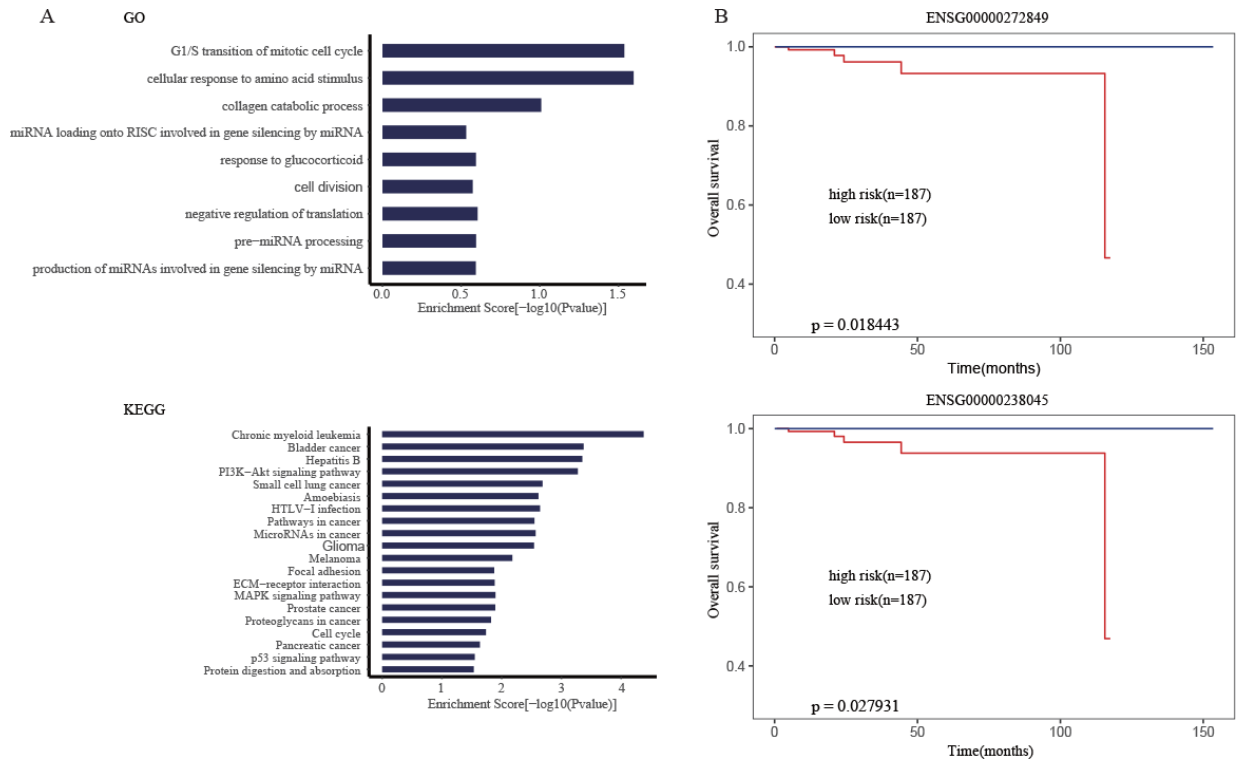

**Supplementary Figure 3: The prioritization results in the case study of PRAD. (A)** The GO and KEGG enrichment analysis results for top 10% lncRNAs of PRAD. **(B)** Survival analysis results of two candidate lncRNAs.
